# Supplementary material for: Beyond Viral Suppression: Quality of Life among stable ART Clients in a Differentiated Service Delivery Intervention in Tanzania
Source: Research Square preprint supplement (doi:10.21203/rs.3.rs-91027/v1), 2020-10-15
Supplement: Supplementary file 1 [file 269c76037b477004a0105422.xlsx]

## Sheet: QoL TnT_Additional file 1
Additional file 1: Modified Poisson Regression with Robust Variance: Multivariable Association between Sociodemographic, HIV-care and Service access factors and satisfactory FAHI QoL scores (FGWB and CF domains)
	FGWB		CF
	Clinic	DSD	Clinic	DSD
Covariates	Prevalence ratios and confidence intervals
Sociodemographic factors
Sex
- Female	Ref	Ref	Ref	Ref
- Male	1.01	0.96	1.04	0.99
	[0.93- 1.09]	[0.84-1.09]	[0.97-1.11]	[0.91-1.06]
Age
- 18-25	Ref	Ref	Ref	Ref
- 25-35	0.92	1.12	0.98	0.95
	[0.78-1.08]	[0.80-1.56]	[0.81-1.19]	[0.87-1.04]
- 35-45	0.95	1.18	0.96	0.92
	[0.81-1.11]	[0.86-1.61]	[0.79-1.15]	[0.85-1.00]
- 45-55	0.91	1.08	1.03	0.91*
	[0.77-1.07]	[0.77-1.52]	[0.85-1.24]	[0.83-0.99]
- 55-65	0.94	0.96	0.99	0.97
	[0.77-1.13]	[0.66-1.34]	[0.80-1.21]	[0.88-1.07]
- >65	0.59*	0.71	0.98	0.97
	[0.35-0.98]	[0.39-1.28]	[0.73-1.29]	[0.83-1.13]
Education
- None	Ref	Ref	Ref	Ref
- Primary	0.97	0.95	0.93	1.02
	[0.89-1.05]	[0.79-1.13]	[0.87-1.00]	[0.94-1.11]
- ≥Secondary	0.90	1.18	0.91	1.10
	[0.72-1.13]	[0.98-1.43]	[0.73-1.13]	[0.99-1.22]
Marital status
- Single	Ref	Ref	Ref	Ref
- Married	1.08	1.33**	1.04	1.07
	[0.96-1.21]	[1.10-1.61]	[0.93-1.15]	[0.99-1.17]
- Separated/Divorced/Widowed	1.09	1.23*	1.08	0.99
	[0.97-1.22]	[1.02-1.48]	[0.97-1.20]	[0.89-1.11]
Employment μ	n/a	n/a	n/a	n/a
- Unemployed
- Employed
Income level μ	n/a	n/a	n/a	n/a
- <100,000
- 100,000-300,000
- >300,000
Location
- Bugisi	Ref	Ref	Ref	Ref
- Ngokolo	0.99	0.98	0.82*	0.99
	[0.88-1.12]	[0.88-1.10]	[0.70-0.96]	[0.92-1.07]
Service access factors
Wait time mins
- <90min	0.98	0.88	0.89**	0.96
- >90min)	[0.89-1.07]	[0.75-1.03]	[0.84-0.96]	[0.88-1.04]
Legend: *p < 0.01; **p < 0.001. Significant ratios in bold. μ- No significant bivariate association (p value >0.05) so were excluded in multivariate analysis. n/a=applicable
