# Supplementary material for: Beyond Viral Suppression: Quality of Life among stable ART Clients in a Differentiated Service Delivery Intervention in Tanzania
Source: Research Square preprint supplement (doi:10.21203/rs.3.rs-91027/v1), 2020-10-15
Supplement: Supplementary file 2 [file 7304e48b1931ca8b202ff395.xlsx]

## Sheet: QoL TnT_Additional file 2
Additional file 2: Full Table showing Hierarchical Multiple Linear Regression examining the contribution of Sociodemographic, HIV-care and Service access factors to QoL and variance explainable by domains
	FAHItotal		PWB		EWB		FGWB		SWB		CF
	Clinic	DSD	Clinic	DSD	Clinic	DSD	Clinic	DSD	Clinic	DSD	Clinic	DSD
Covariates	β	β	β	β	β	β	β	β	β	β	β	β
Step 1 – Sociodemographic factors
Sex
Female	Ref	Ref	Ref	Ref	Ref	Ref	Ref	Ref	Ref	Ref	Ref	Ref
Male	4.31	1.31	0.34	-0.11	1.59*	-0.11	0.68	0.29	1.56	1.23	0.13	0.01
	[-0.56-9.15]	[-4.77-7.38]	[-0.83-1.51]	[-1.76-1.54]	[-0.01-3.21]	[-2.07-1.84]	[-0.68-2.03]	[-1.88-2.46]	[-0.17-3.29]	[-0.91-3.37]	[-0.31-0.58]	[-0.60-0.61]
Age
18-25	Ref	Ref	Ref	Ref	Ref	Ref	Ref	Ref	Ref	Ref	Ref	Ref
25-35	-7.62	5.42	-2.45*	0.89	-1.43	5.01	-1.21	0.46	-2.56	-1.36	0.04	0.43
	[-17.3-2.08]	[-11.7-22.60]	[-4.81—0.1]	[-3.77-5.56]	[-4.67-1.79]	[-0.51-10.5]	[-3.94-1.50]	[-5.67-6.59]	[-6.03-0.92]	[-7.41-4.69]	[-0.85-0.94]	[-1.28-2.14]
35-45	-9.73*	6.37	-2.69*	1.55	-1.60	5.70*	-1.39	0.30	-3.91*	-1.32	-0.14	0.16
	[-19.4—0.07]	[-9.93-22.7]	[-5.03—0.34]	[-2.88-5.98]	[-4.82-1.61]	[0.45-10.9]	[-4.09-1.32]	[-5.52-6.12]	[-7.37-0.45]	[-7.07-4.21]	[-1.03-0.75]	[-1.46-1.78]
45-55	-9.82	1.22	-2.80*	-0.14	-2.01	4.39	-1.46	-1.19	-3.71*	-1.76	0.16	-0.08
	[-20.1-0.42]	[-15.6-18.0]	-5.29—0.32]	[-4.70-4.42]	[-5.42-1.40]	[-1.01-9.80]	[-4.33-1.40]	[-7.20-4.80]	[-7.37—0.04]	[-7.69-4.16]	[-0.78-1.10]	[-1.76-1.59]
55-65	-7.41	6.27	-2.23	0.92	0.08	6.16*	-1.52	-0.823	-3.75	-0.40	0.17	0.41
	[-19.2-4.34]	[-11.1-23.7]	-5.08-0.62]	[-3.81-5.65]	[-3.99-3.83]	[0.56-11.8]	[-4.1-1.77]	[-7.06-5.38]	[-7.96-0.46]	[-6.54-5.74]	[-0.92-1.25]	[-1.32-2.14]
>65	-18.81**	-1.23	-6.27**	-1.12	-2.36	8.61**	-7.37**	-4.24	-2.61	-4.71	-0.19	0.22
	[-32.7—4.94]	[-20-17.9]	[-9.63—2.9]	[-6.31-4.06]	[-6.98-2.25]	[2.46-14.7]	[-11.2—3.48]	[-11.1-2.58]	[-7.58-2.37]	[-11.4-2.02]	[-1.47-1.08]	[-1.68-2.12]
Education
- None	Ref	Ref	Ref	Ref	Ref	Ref	Ref	Ref	Ref	Ref	Ref	Ref
- Primary	-0.58	-3.08	-0.90	-0.72	0.15	-0.43	-0.44	-0.53	0.93	-1.39	-0.32	-0.00
	[-5.44-4.27]	[-9.51-3.35]	[-2.08-0.28]	[-2.47-1.02]	[-1.47-1.76]	[-2.50-1.64]	[-1.80-0.92]	[-2.83-1.76]	[-0.81-2.66]	[-3.65-0.88]	[-0.77-0.13]	[-0.64-0.63]
- ≥Secondary	-4.93	5.78	-1.88	0.66	-1.08	2.40	-1.09	2.86	-0.59	-0.58	-0.28	0.47
	[-16.0-6.15]	[-7.06-18.6]	[-4.57-0.81]	[-2.82-4.15]	[-4.77-2.61]	[-1.73-6.54]	[-4.20-2.01]	[-1.73-7.44]	[-4.57-3.37]	[-5.10-3.94]	[-1.30-0.74]	[-0.81-1.75]
Marital status
- Single	Ref	Ref	Ref	Ref	Ref	Ref	Ref	Ref	Ref	Ref	Ref	Ref
- Married	10.14**	11.76**	2.02**	2.02*	2.08*	0.95	3.08**	4.40**	2.95**	3.68**	0.01	0.72*
	[4.42-15.8]	[5.09-18.4]	[0.63-3.40]	[0.21-3.83]	[0.17-3.98]	[-1.19-3.10]	[1.48-4.68]	[2.01-6.78]	[0.90-4.99]	[1.32-6.03]	[-0.51-0.54]	[0.06-1.38]
- Separated/Divorced/Widow	6.95*	8.24*	0.92	0.54	1.50	0.46	2.48**	2.72*	1.78	4.38**	0.26	0.15
	[1.17-12.7]	[1.65-14.8]	[-0.48-2.32]	[-1.25-2.33]	[-0.43-3.42]	[-1.65-2.58]	[0.87-4.10]	[0.37-5.07]	[-0.29-3.85]	[2.06-6.71]	[-0.27-0.80]	[-0.51-0.80]
Employment μ
- Unemployed	Ref	Ref	Ref	Ref	Ref	Ref	Ref	Ref	Ref	Ref	Ref	Ref
- Employed	5.12	0.97	1.49	-0.72	-0.08	-0.19	1.84	0.98	1.66	0.77	0.21	0.18
	[-1.45-11.7]	[-5.61-7.77]	[-0.12-3.08]	[-2.51-1.07]	[-2.27-2.11]	[-2.31-1.93]	[-0.00-3.68]	[-1.36-5.07]	[-0.69-4.02]	[-1.53-3.08]	[-0.39-0.82]	[-0.47-.084]
Income level
- <100,000	Ref	Ref	Ref	Ref	Ref	Ref	Ref	Ref	Ref	Ref	Ref	Ref
- 100,000-300,000	-2.34	-5.67	-0.24	-2.21*	-0.89	-0.69	-0.06	-1.51	-1.14	-1.41	-0.02	0.16
- >300,000	[-8.22-2.50]	[-11.8-0.48]	[-1.42-0.94]	[-3.88—0.54]	[-2.52-0.72]	[-2.67-1.29]	[-1.42-1.30]	[-3.71-0.68]	[-2.88-0.60]	[-3.58-0.76]	[-0.47-0.43]	[-0.45-0.77]
	-0.43	-4.88	-1.34	-1.75	-1.04	-1.12	0.54	-1.69	1.37	-0.64	0.04	0.28
	[-6.56-5.71]	[-12.3-2.52]	[-2.83-0.14]	[-3.76-0.26]	[-3.08-1.00]	[-3.50-1.26]	[-1.17-2.26]	[-4.33-0.95]	[-0.82-3.57]	[-3.25-1.97]	[-0.53-0.60]	[-0.45-1.02]
Location
- Bugisi (Rural)	Ref	Ref	Ref	Ref	Ref	Ref	Ref	Ref	Ref	Ref	Ref	Ref
- Ngokolo (Urban)	8.99*	17.07**	3.08**	4.46**	2.74*	5.01**	2.26*	4.35**	1.95	3.59**	-1.03**	-0.25
	[2.02-15.9]	[10.1-24.0]	[1.38-4.77]	[2.58-6.35]	[0.42-5.06]	[2.76-7.22]	[0.30-4.21]	[1.89-6.80]	[-0.55-4.44]	[1.17-6.01]	[-1.67—0.39]	[-0.94-0.44]
Step 2 - HIV-care
Years on ARV	-0.35	1.05	0.13	0.20	-0.06	0.48	-0.07	0.07	-0.29	0.22	-0.05	0.07
	[-2.0-1.30]	[-0.49-2.60]	[-0.27-0.5]	[-0.22-0.63]	[-0.61-0.48]	[-0.01-0.98]	[-0.54-0.39]	[-0.48-0.62]	[-0.89-0.29]	[-0.32-0.77]	[-0.20-0.10]	[-0.09-0.22]
ARV years group
- ≤4 years	Ref	Ref	Ref	Ref	Ref	Ref	Ref	Ref	Ref	Ref	Ref	Ref
- >4 years	1.19	-5.77	-0.77	-1.51	0.48	-2.89	0.02	-0.57	1.48	-0.28	-0.02	-0.48
	[-7.17-9.55]	[-15.2-3.63]	[-2.80-1.25]	[-4.06-1.04]	[-2.31-3.26]	[-5.91-0.14]	[-2.32-2.36]	[-3.91-2.78]	[-1.51-4.48]	[-3.59-3.03]	[-0.79-0.75]	[-1.41-0.46]
CD4 at ART start	-0.01*	0.00	-0.00*	0.00	-0.01*	0.00	-0.00*	-0.00	-0.00	-0.00	-0.00	0.00
	[-0.03—0.00]	[-0.01-0.02]	[-0.01—0.00]	[-0.00-0.01	[-0.01—0.00]	[0.00-0.00]	[-0.01—0.00]	-0.00-0.00	[-0.01-0.00]	[-0.00-0.00]	[-0.00-0.00]	[-0.00-0.00]
CD4 at ART start group cells/mm3
- <200
- ≥ 200	Ref	Ref	Ref	Ref	Ref	Ref	Ref	Ref	Ref	Ref	Ref	Ref
	-9.65*	-2.97	2.32*	-1.29	3.18*	-2.61	2.57*	0.44	2.07	0.32	-0.50	0.04
	[0.66-18.6]	[-11.9-6.00]	[0.14-4.51]	[-3.73-1.15]	[0.19-6.18]	[-5.49-0.28]	[0.05-5.09]	[-2.71-3.59]	[-1.15-5.29]	[-2.79-3.43]	[-1.33-0.33]	[-0.85-0.93]
Viral load	0.22	-0.02	0.06	-0.00	0.09*	-0.01	0.04	-0.01	0.04	-0.01	-0.01	0.01
(copies/ml)	[-0.06-0.51]	[-0.17-0.13]	[-0.01-0.13]	[-0.04-0.04]	[0.00-0.19]	[-0.06-0.04]	[-0.04-0.12]	[-0.06-0.04]	[-0.06-0.15]	[-0.06-0.04]	[-0.04-0.01]	[-0.00-0.02]
Time since last VL
- ≤6months	Ref	Ref	Ref	Ref	Ref	Ref	Ref	Ref	Ref	Ref	Ref	Ref
- 6mos – 1 year	-0.01	1.93	-0.35	-0.30	0.62	0.77	-0.19	0.22	-0.25	0.92	0.15	0.29
- >1 year	[-4.4-4.37]	[-3.83-7.70]	[-1.42-0.71]	[-1.87-1.26	[-0.83-2.08]	[-1.08-2.63]	[-1.42-1.04]	[-1.83-2.28]	[-1.81-1.32]	[-1.11-2.95]	[-0.25-0.55]	[-0.29-0.86]
	-1.85	3.83	-1.31	0.75	-0.81	1.82	-1.15	1.08	1.38	0.06	0.04	0.09
	[-10.3-6.64]	[-2.94-10.6]	[-3.37-0.75]	[-1.09-2.59]	[-3.64-2.01]	[--0.35-4.00]	[-3.53-1.23]	[-1.33-3.50]	[-1.66-4.42]	[-2.32-2.44]	[-0.74-0.82]	[-0.57-0.77]
Step 3 –Service access
Time spent cliniclub	-46.8	18.4	-7.29	0.45	-41.2**	-25.7	5.53	24.8	0.67	16.6	-4.51	2.93
	[-106.1-12.4]	[-63.8-100.6]	-21.7-0.75]**	[-21.9-22.8]	[-60.9—21.5]	[-52.2-0.76]	[-11.1-22.1]	[-4.46-53.9]	[-20.6-21.9]	[-12.3-45.4]	[-9.98-0.94]	[-5.26-11.1]
Wait time mins
- Short (≤90)	Ref	Ref	Ref	Ref	Ref	Ref	Ref	Ref	Ref	Ref	Ref	Ref
- Long (>90)	3.45	-19.65**	0.79	-2.25	1.42	-6.25**	0.03	-4.81**	1.28	-6.13**	-0.08	-0.29
	[-3.54-10.4]	[-29.9—9.36]	[-0.9-2.48]	[-5.05-0.54]	[-0.91-3.75]	[-9.54—2.92]	[-1.92-1.99]	[-8.47—1.14]	[-1.22-3.79]	[-9.75—2.51]	[-0.73-0.56]	[-1.31-0.74]
Visit Frequency
- ≤ 2 months	Ref	Ref	Ref	Ref	Ref	Ref	Ref	Ref	Ref	Ref	Ref	Ref
- 2 months	-0.83	6.86**	-0.03	1.82*	-1.40	2.17*	0.62	1.41	-0.31	1.53	0.29	0.00
	[-9.72-8.1]	[0.92-12.8]	[-2.19-2.12]	[0.21-3.44]	[-4.36-1.56]	[0.26-4.09]	[-1.87-3.11]	[-0.69-3.50]	[-3.49-2.88]	[-0.53-3.59	[-0.53-1.11]	[-0.59-0.59]
Time spent travel	25.38	0.47	-0.27	2.19	11.23	-0.16	4.72	1.67	5.78	-2.97	3.91	-0.36
	[-71.6-122.4]	[-47.9-48.8]	[-23.9-23.2]	[-10.9-15.3]	[-21.1-43.5]	[-15.7-15.4]	[-22.4-31.9]	[-15.6-18.9]	[-28.9-40.5]	[-20.0-14.1]	[-5.03-12.8]	[-5.18-4.45]
Travel time
- Short (≤1hr)	Ref	Ref	Ref	Ref	Ref	Ref	Ref	Ref	Ref	Ref	Ref	Ref
- Long (>1hr)	-2.96	11.1	-0.05	0.97	-0.52	4.85*	-0.83	1.19	-1.39	3.33	-0.16	0.72
	[-10.8-4.84]	[-0.53-22.6]	[-1.94-1.84]	[-2.18-4.12]	[-3.12-2.08]	[1.11-8.58]	[-3.01-1.36]	[-2.95-5.33]	[-4.19-1.39]	[-0.76-7.42]	[-0.88-0.55]	[-0.44-1.87]
Variance explained by risk profiles(N=clinic vs DSD)
Step 1 R2	0.102	0.229	0.103	0.205	0.085	0.184	0.119	0.222	0.118	0.217	0.059	0.058
(N=378 vs 251)
Step 2 R2	0.145	0.289	0.146	0.243	0.114	0.268	0.169	0.253	0.139	0.258	0.091	0.086
(N=351 vs 226)
Step 3 R2	0.149	0.435	0.149	0.302	0.185	0.534	0.167	0.297	0.148	0.351	0.098	0.099
N=345 vs 223
AIC Step 3	8803	8692	5969	6077	6603	6415	6258	6.63	6723	6523	4034	4081
Legend: *p < 0.01; **p < 0.001.
